# Supplementary material for: Atomically thin PdSeO3 nanosheets: a promising 2D photocatalyst produced by quaternary ammonium intercalation and exfoliation
Source: Royal Society of Chemistry journal article supplement (doi:10.1039/d0cc01642j), 2020-01-01
Supplement: d0cc01642j1.pdf [file d0cc01642j1.pdf]

## Supporting Information

### Atomically-thin PdSeO<sub>3</sub> Nanosheets: Promising 2D Photocatalyst Produced by Quaternary Ammonium Intercalation and Exfoliation

Xiuming Zhang, Jia Liu\*, Erhuang Zhang, Rongrong Pan, Yuemei Li, Xiaodong Wan,  
Hongzhi Wang, Jiatao Zhang\*

Beijing Key Laboratory of Construction Tailorable Advanced Functional Materials and  
Green Applications, Experimental Center of Advanced Materials, School of Materials  
Science and Engineering, Beijing Institute of Technology, Beijing 100081, China

## S1. Experimental Section

**Chemicals and materials.** Palladium nitrate dihydrate ( $\text{Pd}(\text{NO}_3)_2 \cdot 2\text{H}_2\text{O}$ ,  $\text{Pd} \geq 39\%$ ), Tetraethylammonium bromide (TEAB, 98%), Polyvinylpyrrolidone (PVP  $M_w=58000$ ) were purchased from Aladdin Reagent. Acetonitrile (AN) and N, N-dimethyl formamide (DMF) were purchased from Tianjin ZhiYuan Reagent Co., Ltd. Selenic acid ( $\text{H}_2\text{SeO}_4$ , 40%) solution was purchased from Alfa Aesar. Potassium nitrate ( $\text{KNO}_3$ , 99%) was purchased from XiYa Reagent.

**Synthesis of  $\text{PdSeO}_3$  bulk crystals.**  $\text{PdSeO}_3$  bulk crystals were prepared according to the procedure described in earlier publication. Typically, 116.7 mg of  $\text{Pd}(\text{NO}_3)_2 \cdot 2\text{H}_2\text{O}$ , 88.6 mg of  $\text{KNO}_3$ , 0.5 mL of  $\text{H}_2\text{SeO}_4$  and 0.2 mL of water were added in a 25-mL PTFE-lined autoclave. The autoclave was sealed and heated at 200 °C in an oven. After four days of reaction, the products were collected by centrifugation, and were washed several times with water and methanol.

**Synthesis of  $\text{PdSeO}_3$  nanosheets.** A two-electrode electrochemical cell was used to conduct the intercalation reaction. The CHI760E electrochemical workstation (Chenhua, Shanghai, China) was used as the power source.  $\text{PdSeO}_3$  bulk crystals (20 mg) closely wrapped within carbon cloth were placed as the cathode and graphite rod was used as the anode. Specifically, the carbon cloth was cut into small piece with the size of 2 cm  $\times$  2 cm. After placing the  $\text{PdSeO}_3$  bulk crystals in the center, the carbon cloth was folded three times. Then, it was clamped with an alligator clip and the part in contact with the  $\text{PdSeO}_3$  samples was immersed in the electrolyte. The electrolyte solution was made by dissolving tetraethylammonium bromide (TEAB) in acetonitrile

(40 mL; 5 mg mL<sup>-1</sup>). The applied voltage was set at 8 V and the intercalation process was allowed to proceed for 2 h. After completion of the reaction, the as-intercalated PdSeO<sub>3</sub> were washed several times with ethanol, followed by mild sonication in a solution containing polyvinylpyrrolidone (PVP, M<sub>w</sub> = 58000) and N, N-dimethyl formamide (40 mL; 0.2 M). The dispersion was subsequently centrifuged and washed several times with isopropanol to eliminate the PVP residuals. Finally, to remove the large aggregates, the dispersion was centrifuged at 1000 rpm for 4 min and the precipitates were discarded.

**Photocatalytic reaction.** Photocatalytic hydrogen evolution was carried out in a Pyrex reaction cell connected to a closed gas circulation and evacuation system (Beijing Perfectlight Technology, Labsolar 6A). The sample (4 mg of PdSeO<sub>3</sub> bulk crystals or PdSeO<sub>3</sub> nanosheets) was dispersed in 100 mL of aqueous solution containing 0.5 M Na<sub>2</sub>S and 0.5 M Na<sub>2</sub>SO<sub>3</sub> as the sacrificial agents. A 300 W Xe lamp was used to simulate the full spectrum of solar light. A Pyrex glass vessel with a cooling water-circulating jacket acted as the reactor and the temperature of the reaction solution was maintained at 20 °C by a flow of cooling water. The amount of evolved hydrogen was determined with online gas chromatography (Agilent; GC-7890B, MS-5A column, TCD, Ar Carrier). The photocatalytic water splitting or water oxidation reaction was performed under the same conditions except the pure water or 20 mM NaIO<sub>3</sub> (or 2 mM FeCl<sub>3</sub>) aqueous solution was used as the reaction solvent.

**Photoelectrochemical (PEC) measurements.** The PEC measurements were performed using a standard three-electrode potentiostat system with a Pt counter

electrode and a saturated calomel electrode. The working electrode was prepared by depositing samples (PdSeO<sub>3</sub> bulk crystals or PdSeO<sub>3</sub> nanosheets) onto the ITO substrate (1 cm × 2 cm) that has been previously cleaned with ethanol and water. The surface area of the sample exposed to the electrolyte was fixed at 1 cm<sup>2</sup>. An aqueous solution containing 0.5 M Na<sub>2</sub>S and 0.5 M Na<sub>2</sub>SO<sub>3</sub> was used as the electrolyte. The working electrode was illuminated from the front side with an optical fiber source (FX300, Beijing Perfectlight Technology Co. Ltd.). The EIS Nyquist plots were collected with the frequency ranging from 100 kHz to 0.1 Hz and the modulation amplitude of 5 mV.

**Measurements and instruments.** Low-resolution transmission electron microscopy (TEM) images were obtained by HITACHI H-7650 (accelerating voltage of 80 kV) electron microscopy. High-resolution transmission electron microscopy (HRTEM) characterization and energy dispersive X-ray spectroscopy (EDS) analysis were performed using transmission electron microscopy (FEI Tecnai G2 F20 S-Twin, acceleration voltage of 200 kV) equipped with X-ray energy-dispersive spectroscopy detector. The XRD patterns were obtained using a Bruker D8 multiply crystals X-ray diffractometer (5° min<sup>-1</sup>). UV-Vis spectra were recorded on a Shimadzu UV-3600 spectrophotometer at RT. The XPS spectra were obtained with a PerkinElmer Physics PHI 5300 spectrometer using mono-chromatic Al K $\alpha$  radiation (1486.7 eV). All binding energies were corrected based on the C 1s peak (284.8 eV). The TEM and XPS characterizations were supported by Beijing Zhongke-baice Technology Service Co., Ltd.

## S2. Supplementary Data

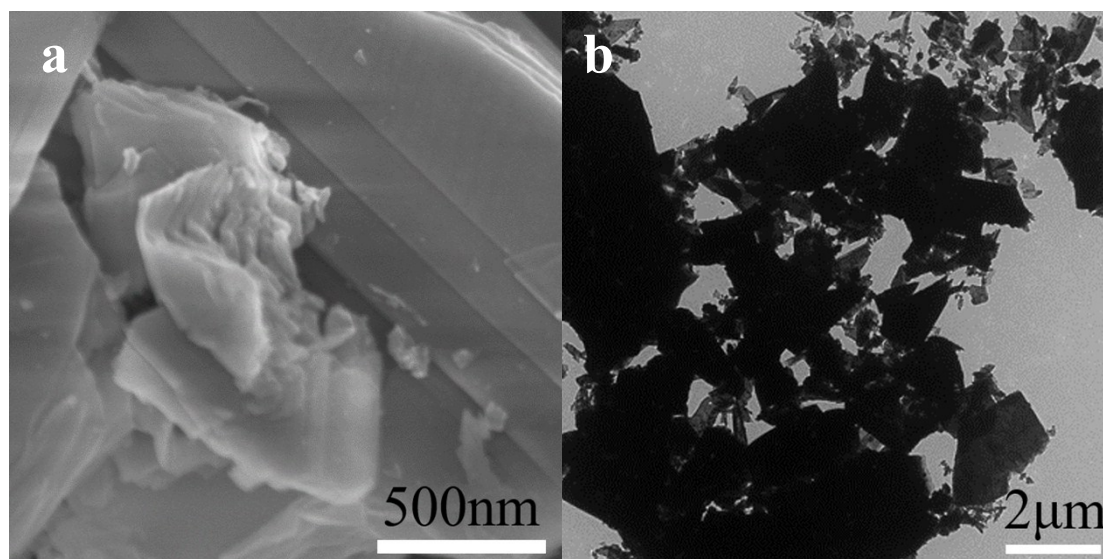

Figure S1 (a) SEM image and (b) TEM image of the PdSeO<sub>3</sub> bulk crystals.

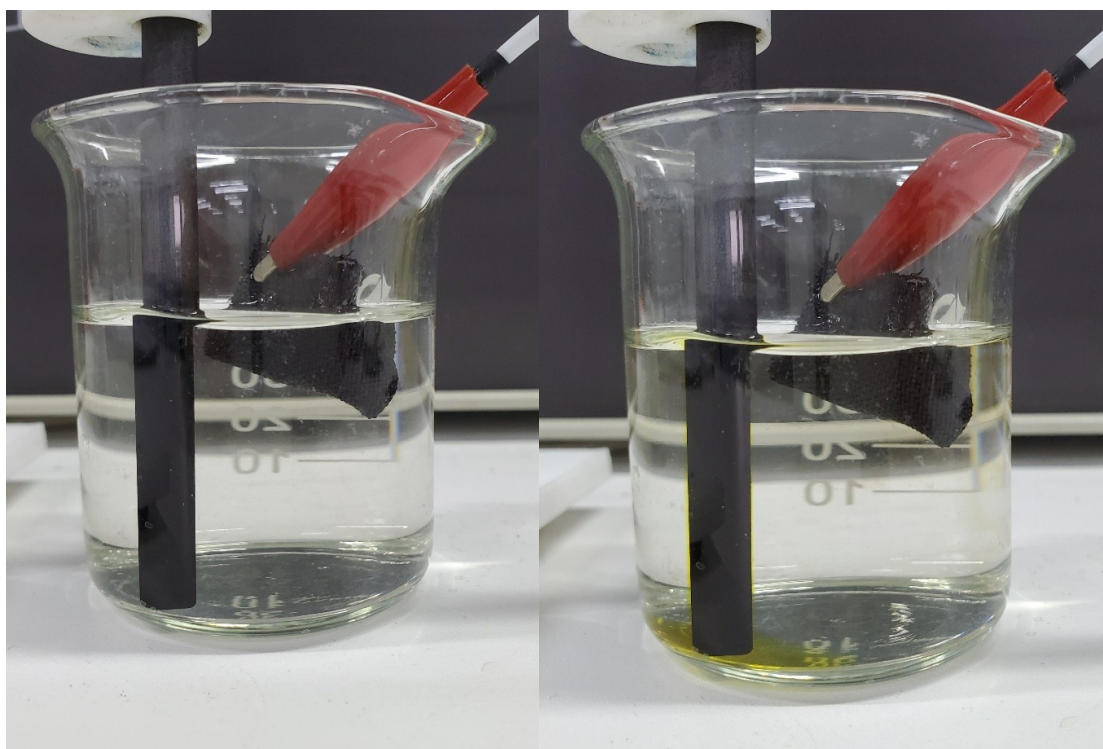

Figure S2 Photographs showing the color change near the graphite anode before (left) and during (right) the electrochemical exfoliation of the PdSeO<sub>3</sub> bulk crystals.

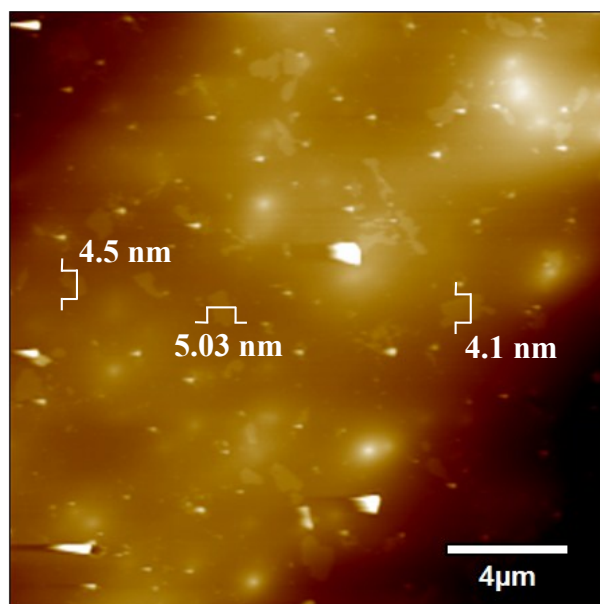

Figure S3 AFM image and the corresponding height profiles of the exfoliated PdSeO<sub>3</sub> nanosheets.

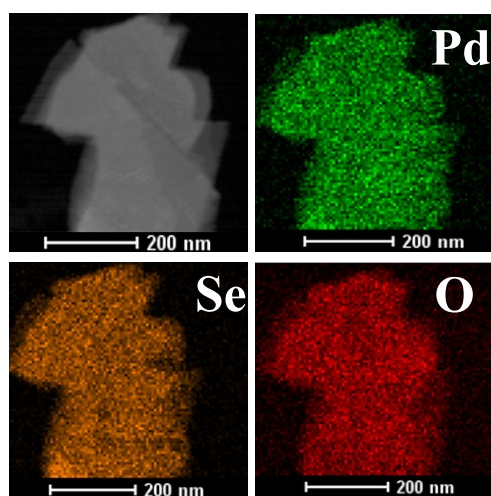

Figure S4 HAADF-STEM image and the corresponding EDX elemental maps for the PdSeO<sub>3</sub> nanosheets.

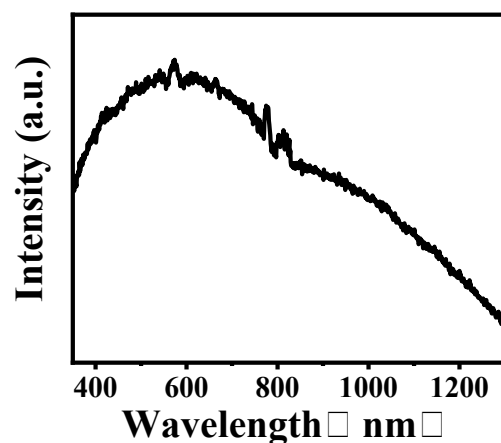

Figure S5 UV-Vis-NIR absorption spectrum of the PdSeO<sub>3</sub> bulk crystals.

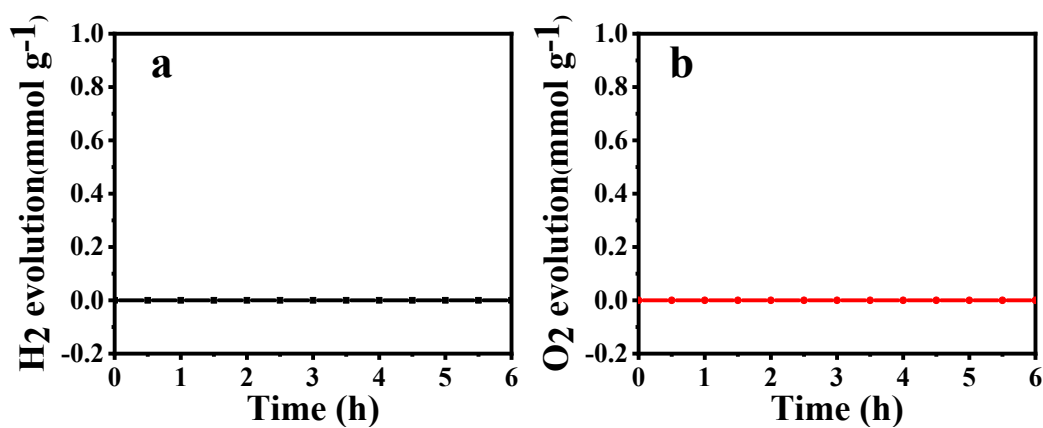

Figure S6 (a) Hydrogen and (b) Oxygen evolution curves for the exfoliated PdSeO<sub>3</sub> nanosheets in photocatalytic pure water splitting under UV-Vis light irradiation.

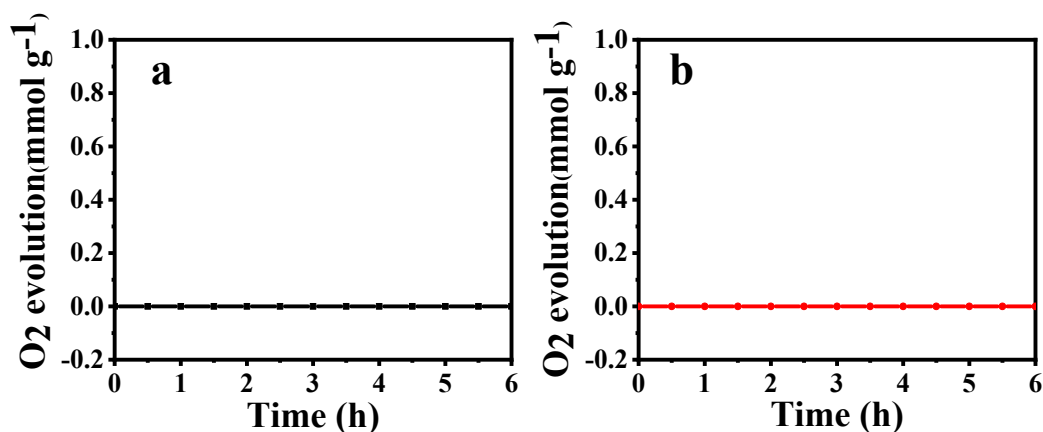

Figure S7 Photocatalytic oxygen evolution curves for the PdSeO<sub>3</sub> nanosheets using (a) NaIO<sub>3</sub> (20 mM) or (b) FeCl<sub>3</sub> aqueous solution (2 mM, pH=2) as the electron sacrificial agents under UV-Vis light irradiation.

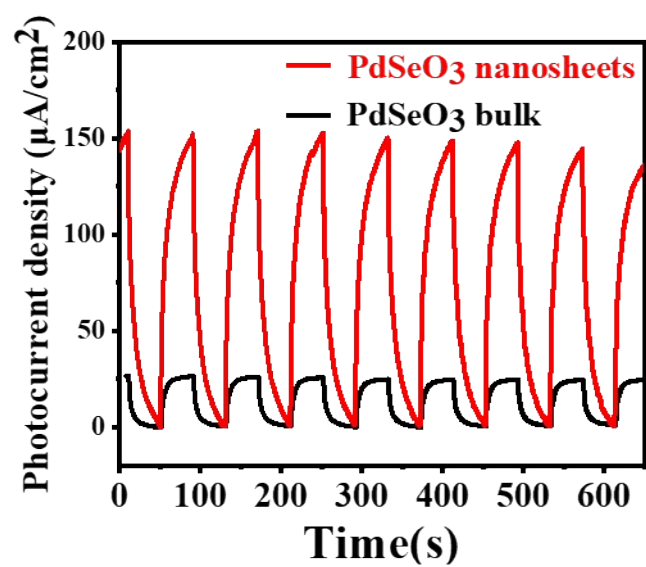

Figure S8 Photocurrent density–time curves for PdSeO<sub>3</sub> nanosheets and PdSeO<sub>3</sub> bulk crystals.

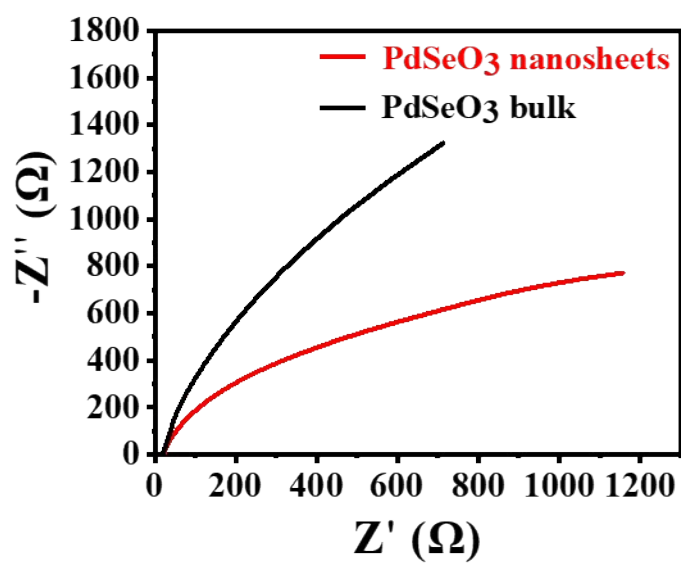

Figure S9 The EIS Nyquist plots for PdSeO<sub>3</sub> nanosheets and PdSeO<sub>3</sub> bulk crystals.



Table S1 Elemental composition of the PdSeO<sub>3</sub> nanosheets determined by EDX elemental analysis. The content of oxygen cannot be precisely determined considering its small atomic number (< 18).

| Element | Atomic ratio (%) |
|---------|------------------|
| O       | 41.97            |
| Se      | 28.53            |
| Pd      | 29.49            |
